# Supplementary material for: Establishment of the Causal Agent(s) of Spike Shedding and Stem Wilting of Pepper (Piper nigrum L.) in Morogoro District, Tanzania
Source: Hindawi journal article supplement (doi:10.1155/2020/8860701), 2020-11-09
Supplement: f1 [file 8860701.f1.pdf]

Table 1: Diagnosis and recommendation integrated system norms (DRIS Norms) for soil nutrient status for pepper (*Piper nigrum* L.)

| Nutrients       | Unit | Soil fertility status |           |            |             |
|-----------------|------|-----------------------|-----------|------------|-------------|
|                 |      | Deficient             | Low       | Optimum    | High        |
| pH              | -    | < 4.00                | 4.0-4.71  | 4.75-6.15  | 6.16-6.88   |
| Org. Carbon     | %    | < 0.10                | 0.10-2.00 | 2.00-7.50  | 7.50-8.00   |
| Bray Phosphorus | ppm  | < 0.60                | 0.60-12.0 | 12.0-96.0  | 97.0-150.0  |
| Exch. Potassium | ppm  | < 35.0                | 36.0-90.0 | 91.0-289.0 | 290.0-930.0 |
| Exch. Calcium   | ppm  | < 15.0                | 15.0-60.0 | 61-139.0   | 139.1-205.5 |
| Exch. Magnesium | ppm  | < 8.0                 | 8-40      | 40-194     | 195-300     |
| DTPA Iron       | ppm  | < 3.0                 | 3.0-11.0  | 12.0-65.0  | 66.0-98.0   |
| DTPA Manganese  | ppm  | < 2.5                 | 2.5-5.0   | 5.0-35.0   | 36.0-55.0   |
| DTPA Zinc       | ppm  | < 0.45                | 0.50-2.0  | 2.10-7.0   | 8.0-52.0    |
| DTPA Copper     | ppm  | < 0.11                | 0.12-0.50 | 0.51-7.7   | 7.8-14.20   |

Source: Srinivasan *et al.* (2007)

Table 2: Diagnosis and recommendation integrated system norms (DRIS Norms) for leaf nutrient concentration in pepper (*Piper nigrum* L.)

| Nutrients  | Unit | Leaf nutrient concentration status |           |           |             |         |
|------------|------|------------------------------------|-----------|-----------|-------------|---------|
|            |      | Deficient                          | Low       | Optimum   | High        | Excess  |
| Nitrogen   | %    | < 1.06                             | 1.06-1.64 | 1.65-2.79 | 2.80-3.40   | > 3.40  |
| Phosphorus | %    | < 0.03                             | 0.03-0.10 | 0.11-0.26 | 0.27-0.37   | > 0.37  |
| Potassium  | %    | < 0.33                             | 0.33-1.77 | 1.78-2.84 | 2.85-3.68   | > 3.68  |
| Calcium    | %    | < 0.47                             | 0.47-1.41 | 1.42-3.33 | 3.34-4.30   | > 4.30  |
| Magnesium  | %    | < 0.20                             | 0.20-0.39 | 0.40-0.69 | 0.70-1.06   | > 1.06  |
| Sulphur    | %    | < 0.01                             | 0.01-0.08 | 0.09-0.29 | 0.30-0.38   | > 0.38  |
| Iron       | ppm  | < 60                               | 60-125    | 126-114.5 | 114.6-179.6 | > 179.6 |
| Manganese  | ppm  | < 30                               | 30-108    | 109-721   | 722-1027    | > 1027  |
| Zinc       | ppm  | < 10                               | 10-20     | 21-67     | 68-100      | > 100   |
| Boron      | ppm  | < 6                                | 6-15      | 16-120    | 120-200     | > 200   |

Source: Srinivasan *et al.* (2007)
